# Supplementary material
Source: MDPI journal article supplement (https://www.mdpi.com/2077-0472/7/12/99)
Supplement: s1 [file s1]

## Supplementary 1. Detailed Description of Rodent Risk Assessment

A list of ten rodent species in Wonji Shoa sugarcane farm and the surrounding natural ecosystem and details of their resource requirements were collected from the literature [33]. This study analyzed stomach contents of rodents to see their forage types in the study area. We applied cross-taxonomic sustainability index (the overlaps of the environmental threats from the sugarcane and the rodents resource requirements) to see the impact of the change on their abundance. The environmental threats from the sugarcane can have impacts on their feeding resources if it causes a change in foraging habitats availability and/or change in food abundance in the existing foraging habitats. It can also affect nesting success if it causes change in nesting habitats availability and/or reduction in nesting success in the existing nesting habitats. Thus:

$$Risk\ score = (Dt + Nt) / R$$

where  $Dt$  describes risk score associated with reduced foraging materials or foraging habitats,  $Nt$  describes the risk associated with reduced breeding habitat or breeding success and  $R$  describes species reliance on a particular habitat. We used trap successes in different habitats as a surrogate measure for species reliance on the habitat.

$$Dt = A/(D \times F) + B/F$$

where  $A$  describes the number of points of coincidence between environmental threats from sugarcane and foraging materials,  $B$  describes the number of points of coincidence between the environmental threats and foraging habitat,  $D$  describes total number of dietary components used by the species and  $F$  describes total number of foraging habitat components used by the species. The dietary component was determined by examining the stomach of each species in different habitats. Unidentified matters were not included in the risk score calculation.

$$Nt = C1/N + C2/N$$

where  $C1$  and  $C2$  are number of points of coincidence on the species' use of nesting habitat components if impact is through reduced success in existing habitat and loss of habitat, respectively, and  $N$  describes the number of nesting habitat components used by the species.

Risk score for each of the six environmental threats identified via key informant interview was calculated for each species. The total risk score for each species we summed the values of  $Dt$  and  $Nt$  over all six environmental threats from the sugarcane and divided the cumulative score by  $R$ , with higher scores representing greater impact.

The risk score was calculated for all rodents and the result was indicated (Table 2). Only the detail for three species were presented here under.

### 1) The Potential Impact of Environmental Threats from the Sugarcane on the Resource Requirements of *M. natalensis*

| Resource Category        | Components of resource requirement                       |
|--------------------------|----------------------------------------------------------|
| Diet                     | Sugarcane fiber, grass, animal matter, water ( $D = 4$ ) |
| Foraging habitat         | RVF; ACw; SBL; GL; CL; IS; YS; MS ( $F = 8$ )            |
| Nesting/Roosting habitat | RVF; ACw; SBL; GL; YS; MS; CR ( $F = 7$ )                |
| Reliance on farmland     | 3                                                        |

NB: Immature sugarcane cannot be resting habitat due to inadequate ground cover

Reliance on farmland ( $R$ ) is 1 when species rely on 1 or 2 habitats, 2 when species rely on 3 or 4 habitats and 3 when the habitat or biotopes of the organism is 5 or greater

| Sugarcane Related Environmental Threat | Impact on Foraging Materials | Impact on Foraging Habitat/Foraging Activity | Impact on Nesting Habitat/Nesting Success |
|----------------------------------------|------------------------------|----------------------------------------------|-------------------------------------------|
| Clearing and grubbing                  | ↓ Grass                      | ↓ RVF                                        | ↓ RVF                                     |

|                               |                                                            |                                 |                                 |
|-------------------------------|------------------------------------------------------------|---------------------------------|---------------------------------|
|                               | ↓ Animal matter                                            | ↓ ACw<br>↓ SBL<br>↓ GL          | ↓ ACw<br>↓ SBL<br>↓ GL          |
| Increased agrochemical inputs | ↓ Animal matter<br>↓ Grass<br>↓ Water                      | -<br>-<br>-                     | -<br>-<br>-                     |
| Fire                          | ↓ Sugarcane fiber<br>↓ Grass<br>↓ Animal matter            | ↓ MS                            | ↓ MS                            |
| Human disturbances            |                                                            | ↓ RVF<br>↓ ACw<br>↓ SBL<br>↓ GL | ↓ RVF<br>↓ ACw<br>↓ SBL<br>↓ GL |
| Effluent from the factory     | ↓ Animal matter<br>↓ Grass                                 | ↓ RVF<br>↓ GL                   | ↓ RVF<br>↓ GL                   |
| Water Availability/Quality    | ↓ Sugarcane fiber<br>↓ Grass<br>↓ Animal matter<br>↓ Water | ↓ CL                            | ↓ CL                            |

RVF = riverine forest; ACw = Acacia woodland; SBL = Shrub bushland; GL = grassland/Grazing land;  
CA = Crop land; IS = Immature sugarcane; YS = young sugarcane; MS = Mature sugarcane

#### Risk Score

| Sugarcane Related Environmental Threats | A | B | C | Risk Score <sup>1</sup> |
|-----------------------------------------|---|---|---|-------------------------|
| Land Clearing during expansion          | 2 | 5 | 5 | 0.38                    |
| Increased agrochemical inputs           | 3 | 0 | 0 | 0.03                    |
| Fire                                    | 3 | 1 | 1 | 0.12                    |
| Human disturbances                      | 0 | 4 | 4 | 0.35                    |
| Effluent from the factory               | 2 | 2 | 2 | 0.20                    |
| Water Availability and Water Quality    | 4 | 1 | 1 | 0.13                    |
| Total risk                              |   |   |   | 1.21                    |

$$^1 \text{Risk score} = (A/(D \times F) + B/F + C/N)/R$$

## 2) The Potential Impact of Sugarcane on the Resource Requirements of *Arvicantis dembeensis*

|                          |                                                   |
|--------------------------|---------------------------------------------------|
| Resource Category        | Components of resource requirement                |
| Diet                     | Monocot seed, grass, animal matter, Water (D = 4) |
| Foraging habitat during  | RVF; ACw; SBL; GL; CL, ISP; YS; MS (F = 8)        |
| Nesting/Roosting habitat | RVF; ACw; SBL; GL; YS; CL, MS (F = 7)             |
| Reliance on farmland     | 3                                                 |

NB: Immature sugarcane cannot be resting habitat due to inadequate ground cover

| Sugarcane Related Environmental Threat | Overlaps with Foraging Materials             | Overlaps with Foraging Habitat  | Overlaps with Nesting Habitat   |
|----------------------------------------|----------------------------------------------|---------------------------------|---------------------------------|
|                                        | ↓ Grass                                      | ↓ RVF                           | ↓ RVF                           |
| Clearing and grubbing                  | ↓ Animal matter<br>↓ Monocot seed            | ↓ ACw<br>↓ SBL<br>↓ GL          | ↓ ACw<br>↓ SBL<br>↓ GL          |
| Increased agrochemical inputs          | ↓ Animal matter<br>↓ Grass<br>↓ Monocot seed |                                 |                                 |
| Fire                                   | ↓ Monocot seed<br>↓ Grass<br>↓ Animal matter | ↓ MS                            | ↓ MS                            |
| Human disturbances                     |                                              | ↓ RVF<br>↓ ACw<br>↓ SBL<br>↓ GL | ↓ RVF<br>↓ ACw<br>↓ SBL<br>↓ GL |
| Effluent from the factory              | ↓ Animal matter                              | ↓ SBL                           | ↓ SBL                           |

|                            |                   |       |       |
|----------------------------|-------------------|-------|-------|
|                            | ↓ Grass           | ↓ RVF | ↓ RVF |
|                            | ↓ Monocot seed    | ↓ GL  | ↓ GL  |
| Water Availability/Quality | ↓ Sugarcane fiber | ↓ CL  | ↓ CL  |
|                            | ↓ Grass           |       |       |
|                            | ↓ Animal matter   |       |       |
|                            | ↓ Water           |       |       |

RVF = riverine forest; ACw = Acacia woodland; SBL = Shrub bushland; GL = grassland; CA = Crop land; IS = Immature sugarcane; YS = young sugarcane; MS = Mature sugarcane.

#### Risk Score

| Sugarcane Related Environmental Threats | A | B | C | Risk Score <sup>1</sup> |
|-----------------------------------------|---|---|---|-------------------------|
| Clearing and Grabbing                   | 3 | 5 | 5 | 0.38                    |
| Increased agrochemical inputs           | 3 | 0 | 0 | 0.03                    |
| Fire                                    | 3 | 1 | 1 | 0.12                    |
| Human disturbances                      | 0 | 4 | 4 | 0.35                    |
| Effluent from the factory               | 3 | 3 | 3 | 0.30                    |
| Water Quantity and Quality              | 4 | 1 | 1 | 0.13                    |
| Total risk                              |   |   |   | 1.4                     |

$$\text{Risk score} = (A/(D \times F) + B/F + C/N)/R$$

### 3) The Potential Impact of Sugarcane on the Resource Requirements of *Stenocephalemys albiges*

| Resource Category           | Components of resource requirement                   |
|-----------------------------|------------------------------------------------------|
| Diet                        | Sugarcane fiber, grass, animal matter, water (D = 4) |
| Foraging habitat during wet | RVF; ACw; SBL; GL; IS; YS; MS (F = 7)                |
| Nesting/Roosting habitat    | RVF; ACw; SBL; GL; YS; MS (N = 6)                    |
| Reliance on farmland        | 3                                                    |

NB: Immature sugarcane cannot be resting habitat due to inadequate ground cover

| Sugarcane Related Environmental Threat | Overlap with Foraging Materials | Overlap with Foraging Habitat | Overlap with Nesting Habitat |
|----------------------------------------|---------------------------------|-------------------------------|------------------------------|
|                                        | ↓ Grass                         | ↓ SBL                         | ↓ SBL                        |
| Clearing and grubbing                  | ↓ Animal matter                 | ↓ RVF                         | ↓ RVF                        |
|                                        |                                 | ↓ ACw                         | ↓ ACw                        |
|                                        |                                 | ↓ GL                          | ↓ GL                         |
|                                        | ↓ Animal matter                 |                               |                              |
| Increased agrochemical inputs          | ↓ Sugarcane fiber               |                               |                              |
|                                        | ↓ Grass                         |                               |                              |
|                                        | ↓ Water                         |                               |                              |
|                                        | ↓ Sugarcane fiber               | ↓ MSP                         | ↓ MS                         |
| Fire                                   | ↓ Grass                         |                               |                              |
|                                        | ↓ Animal matter                 |                               |                              |
| Human disturbance                      |                                 | ↓ SBL                         | ↓ SBL                        |
|                                        |                                 | ↓ RVF                         | ↓ RVF                        |
|                                        |                                 | ↓ ACw                         | ↓ ACw                        |
|                                        |                                 | ↓ GL                          | ↓ GL                         |
| Effluent from the factory              | ↓ Animal matter                 | ↓ SBL                         | ↓ SBL                        |
|                                        | ↓ Grass                         |                               |                              |
|                                        | ↓ Water                         |                               |                              |
|                                        | ↓ Sugarcane fiber               | ↓ IS                          | ↓ YS                         |
| Water quantity and Quality             | ↓ grass                         | ↓ YS                          | ↓ MS                         |
|                                        | ↓ animal matter                 | ↓ MS                          |                              |
|                                        | ↓ water                         |                               |                              |

RVF = riverine forest; ACw = Acacia woodland; SBL = Shrub bushland; GL = grassland; CA = Crop land; IS = Immature sugarcane; YS = young sugarcane; MS = Mature sugarcane

#### Risk Score

| Sugarcane Related Environmental Threats | A | B | C | Risk Score <sup>1</sup> |
|-----------------------------------------|---|---|---|-------------------------|
|-----------------------------------------|---|---|---|-------------------------|

|                                                    |   |   |   |      |
|----------------------------------------------------|---|---|---|------|
| Clearing land and conversion to monocrop sugarcane | 2 | 4 | 4 | 0.43 |
| Increased agrochemical inputs                      | 4 | 0 | 0 | 0.04 |
| Fire                                               | 3 | 1 | 1 | 0.19 |
| Human disturbance                                  | 0 | 4 | 4 | 0.41 |
| Effluent from the factory                          | 2 | 1 | 1 | 0.13 |
| Water Quality and Quantity deterioration           | 4 | 3 | 2 | 0.30 |
| Total risk                                         |   |   |   | 1.50 |

$$^1 \text{Risk score} = (A/(D \times F) + B/F + C/N)/R$$

**Table S1.** Rodent abundance in the different sugarcane growth stages and nearby bushland.

| Rodents Species                | Species-Wise Abundance in Different Habitats |     |     |     |                          | Abundance % |
|--------------------------------|----------------------------------------------|-----|-----|-----|--------------------------|-------------|
|                                | ISP                                          | YSP | MSP | BLA | Individuals Captured (*) |             |
| <i>Mastomys natalensis</i>     | 15                                           | 45  | 27  | 24  | 111 (181)                | 27.33       |
| <i>Arvicanthis dembeensis</i>  | 8                                            | 23  | 5   | 29  | 65 (96)                  | 16.00       |
| <i>Arvicanthis niloticus</i>   | 2                                            | 6   | 2   | 8   | 18 (32)                  | 4.40        |
| <i>Stenocephalemys albipes</i> | 9                                            | 22  | 18  | 10  | 59 (94)                  | 14.53       |
| <i>Pelomys harringtoni</i>     | 3                                            | 6   | 4   | 22  | 35 (63)                  | 8.62        |
| <i>Mus mahomet</i>             | 7                                            | 8   | 13  | 4   | 32 (40)                  | 7.90        |
| <i>Mus musculus</i>            | 5                                            | 5   | 6   | 6   | 22 (26)                  | 5.42        |
| <i>Rattus rattus</i>           | 2                                            | 6   | 1   | 6   | 15 (25)                  | 3.70        |
| <i>Crocidura flavescens</i>    | 6                                            | 8   | 5   | 7   | 39(13)                   | 6.40        |
| <i>Crocidura fumosa</i>        | 5                                            | 8   | 5   | 5   | 23 (33)                  | 5.70        |
| Total                          | 62                                           | 137 | 86  | 121 | 406 (629)                | 100         |

ISP = Immature sugarcane; YSP = Young Sugarcane; MSP = Mature Sugarcane; BLA = Bushland Area

**Table S2.** List of rodents, their foraging habitats, nesting habitats, forage types, risk score and abundance.

| Species                        | Foraging Habitats <sup>1</sup>    | Nesting Habitats <sup>2</sup> | Foraging <sup>3</sup> Materials | Risk Score | Abundance in % |
|--------------------------------|-----------------------------------|-------------------------------|---------------------------------|------------|----------------|
| <i>Mastomys natalensis</i>     | RVF; ACw; SBL; GL; CL; IS; YS; MS | RVF; ACw; SBL; GL; YS; MS; CR | ABCE                            | 1.29       | 27.33          |
| <i>Arvicanthis dembeensis</i>  | RVF; ACw; SBL; GL; CL; IS; YS; MS | RVF; ACw; SBL; GL; YS; CL; MS | BCDE                            | 1.34       | 16.00          |
| <i>Stenocephalemys albipes</i> | RVF; ACw; SBL; GL; IS; YS; MS     | RVF; ACw; SBL; GL; YS; MS     | ABCE                            | 1.23       | 14.53          |
| <i>Pelomys harringtoni</i>     | SBL; IS; YS; MS                   | SBL; YS; MS                   | ABCE                            | 8.00       | 8.62           |
| <i>Mus mahomet</i>             | SBL; IS; YS; MS                   | SBL; YS; MS                   | BCDE                            | 1.59       | 7.90           |
| <i>Mus musculus</i>            | ACw; SBL; GL; IS; YS; MS          | SBL; ACw; GL; YS; MS          | ABCD                            | 1.24       | 5.42           |
| <i>Arvicanthis niloticus</i>   | SBL; IS; YS; MS                   | SBL; YS; MS,                  | BE                              | 1.29       | 4.40           |
| <i>Rattus rattus</i>           | SBL; IS; YS; MS                   | SBL; YS; MS                   | ABCDE                           | 1.44       | 3.70           |
| <i>Crocidura flavescence</i>   | SBL; IS; YS; MS                   | SBL; YS; MS                   | ABCDE                           | 1.20       | 6.40           |
| <i>Crocidura fumosa</i>        | SBL; IS; YS; MS                   | SBL; YS; MS                   | CE                              | 1.28       | 5.7            |

<sup>1</sup> Foraging habitats = (ISP = Immature Sugarcane, YS = Young Sugarcane, MSP = Mature Sugarcane, ACw = Acacia woodland, SBL = Shrub land, GL = Grazing Land, CL = Crop Land, RVF = Riverine forest); <sup>2</sup> Nesting habitats = (ISP = Immature Sugarcane, YS = Young Sugarcane, MSP = Mature Sugarcane, ACw = Acacia woodland, SBL = Shrub land, GL = Grazing Land, CL = Crop Land, RVF = Riverine forest); <sup>3</sup> Foraging materials = (A = Sugarcane fibers, B = Grass, C = Animal matter, D = Monocot seed, E = water)

## Supplementary 2. Detailed Description of Mammal Risk Assessment

We collected list of ten mammal species that used to live on the land currently occupied Wonji Shoa sugarcane and the surrounding area from our key informants. Information on species eco-requirements (feeding and nesting/roosting) was also collected via key informant interview and from the literature. We adopted the risk assessment framework in Butler et al. [35]. The sugarcane industry could affect the mammals if it alters foraging habitat availability and/or foraging materials abundance in the existing foraging habitats. Similarly, it affects mammals if it reduces nesting habitat availability and/or nesting success in the existing nesting habitat). Thus:

$$\text{Risk score} = (Dt + Nt) / R$$

where  $Dt$  describes the risk score associated with reduced foraging materials abundance or availability,  $Nt$  is the risk score associated with reduced habitats or breeding success, and  $R$  is the species' reliance on the land occupied by sugarcane.

$$Dt = \frac{A}{D \times F} + \frac{B}{F}$$

where  $A$  describes the number of points of coincidence between the impact on dietary components,  $B$  describes number of points of coincidence between the impact on foraging habitat components,  $D$  describes total number of dietary components used by the species and  $F$  describes total number of foraging habitat components used by the species.

$$Nt = C1/N + C2/N$$

where  $C1$  and  $C2$  describe number of points of coincidence between potential impact on the species' use of nesting habitat components if the impact is via reduced breeding success in existing habitat and loss of breeding habitat, respectively, and  $N$  describes the number of nesting habitat components used by the species.

Risk scores related to six environmental threats identified via key informant interview were calculated. The environmental threats are (land clearing, pre-harvest fire, agrochemicals, effluent from the factory, human disturbances, deterioration of water quality and quantity). To calculate the total risk score for each species, we summed the values of  $Dt$  and  $Nt$  over all six environmental threats and divided the cumulative score by  $R$ , with higher scores representing greater impact.

The risk score was calculated for all the selected mammals and the result was indicated (Table 2). Only the detail for three species were presented here under.

#### 1) The Potential Impact of Sugarcane on the Resource Requirements of *Tragelaphus scriptus*

| Categories of Resource requirement | Components of resource requirement                               |
|------------------------------------|------------------------------------------------------------------|
| Diet                               | Herbs, twigs, Leaves, crops, flowers, grasses, water ( $D = 7$ ) |
| Foraging habitat during wet        | Forest edge, Bush lands, Riparian vegetation, ( $F = 3$ )        |
| Nesting/Roosting habitat           | Bush lands, Riparian vegetation ( $N = 2$ )                      |
| Reliance on farmland               | 2                                                                |

Reliance of the animal on area occupied by the sugarcane is 1 when species relies on 1 or 2 habitats, 2 when species relies on 3 or 4 habitats and 3 when the habitat or biotopes of the organism is 5 or greater

| Sugarcane Related Environmental Threats | Overlap with Forage | Overlap with Foraging Habitat | Overlap with Nesting Habitat | Remark                                                                                                                             |
|-----------------------------------------|---------------------|-------------------------------|------------------------------|------------------------------------------------------------------------------------------------------------------------------------|
| Clearing and grubbing                   | ↓ Grass             | ↓ Bush land                   | ↓ Riparian forest            | Land clearing for plantation and during expansion has resulted in declining of bushlands, acacia woodlands and riparian vegetation |
|                                         | ↓ Flower            | ↓ Riparian Forest             | ↓ Bush land                  |                                                                                                                                    |
|                                         | ↓ Leaves            | ↓ Forest age                  |                              |                                                                                                                                    |
|                                         | ↓ Herbs             |                               |                              |                                                                                                                                    |
|                                         | ↓ Flowers           |                               |                              |                                                                                                                                    |

|                               |                                              |                                                                                                    |
|-------------------------------|----------------------------------------------|----------------------------------------------------------------------------------------------------|
| Increased agrochemical inputs | ↓ Grass<br>↓ Leaves<br>↓ Herbs               | Agrochemicals had less impact of foraging and nesting habitats                                     |
| Pre-harvest fire              | ↓ Flowers<br>↓ Grass<br>↓ Herbs<br>↓ Flowers | Pre-harvest fire could disturb mammals in the nearby natural habitats and affect nesting successes |
| Human disturbances            | ↓ Flowers<br>↓ Grass<br>↓ Leaves<br>↓ Herbs  | Human disturbance through cutting trees for charcoal, timber and for grazing has reduced habitats  |
| Effluent from the factory     | ↓ water                                      | Effluents could reduce the water quality at the down stream                                        |
| Water Quality and Quantity    | ↓ water                                      | Too much water abstraction and access to the nearby river                                          |

#### Risk Score

| Environmental Threats Related to Sugarcane | A | B | C | Risk Score <sup>1</sup> |
|--------------------------------------------|---|---|---|-------------------------|
| Clearing and Grabbing                      | 4 | 3 | 2 | 1.09                    |
| Increased agrochemical inputs              | 4 | 0 | 0 | 0.09                    |
| Fire                                       | 4 | 0 | 2 | 0.59                    |
| Human Disturbances                         | 4 | 3 | 2 | 1.09                    |
| Effluent from the factory                  | 1 | 0 | 0 | 0.02                    |
| Water Quality                              | 1 | 0 | 0 | 0.02                    |
| Total risk                                 |   |   |   | 2.90                    |

$$^1 \text{ Risk score} = \left( \frac{A}{D \times F} + \frac{B}{F} + C/N \right) / R$$

#### 2) The Potential Impact of Sugarcane on the Resource Requirements of Phacochoerus aethiopicus

| Categories of Resource requirement | Components of resource requirement                                     |
|------------------------------------|------------------------------------------------------------------------|
| Diet                               | Grass, tubers, invertebrates and leaves of woody plants, water (D = 5) |
| Foraging habitat during wet        | Bush land, Riparian forest, woodland, Sugarcane (F = 4)                |
| Nesting/Roosting habitat           | Bush land, Open wood land, Riparian Forest, Sugarcane (N = 4)          |
| Reliance on farmland               | 2                                                                      |

Reliance of the animal on area occupied by the sugarcane is 1 when species relies on 1 or 2 habitats, 2 when species relies on 3 or 4 habitats and 3 when the habitat or biotopes of the organism is 5 or greater.

| Sugarcane Related Environmental Threats | Overlap with Forage            | Overlap with Foraging Habitat  | Overlap with Nesting Habitat | Overlap with Reproduction Active Member                                    |
|-----------------------------------------|--------------------------------|--------------------------------|------------------------------|----------------------------------------------------------------------------|
| Clearing and grubbing                   | ↓ Grass                        | ↓ Bush land                    | ↓ Bush land nesting area     | Unlike other mammals warthog is seen as pest as it feeds on the sugarcane. |
|                                         | ↓ tuber food                   | ↓ Open woodland                | ↓ woodland nesting area      |                                                                            |
|                                         | ↓ Leaves food                  | ↓ Open wood land Foraging area |                              |                                                                            |
|                                         | ↓ Invertebrate                 |                                |                              |                                                                            |
| Increased agrochemical inputs           | ↓ Grass<br>↓ Leaves<br>↓ Tuber |                                |                              | Impact from agrochemicals is less on warthog                               |

|                            |                   |                                                                                                                          |
|----------------------------|-------------------|--------------------------------------------------------------------------------------------------------------------------|
|                            | ↓<br>Invertebrate |                                                                                                                          |
| Fire                       | ↓ Grass           | ↓ Mature Sugarcane                                                                                                       |
|                            | ↓ tuber           | ↓ Mature Sugarcane                                                                                                       |
|                            | ↓ Leaves          |                                                                                                                          |
|                            | ↓<br>invertebrate |                                                                                                                          |
| Human disturbances         | ↓ Grass           | ↓ Bush land                                                                                                              |
|                            | ↓ tuber           | ↓ Open woodland                                                                                                          |
|                            | ↓ Leaves          | ↓ Open wood land                                                                                                         |
|                            | ↓<br>invertebrate | ↓ Bush land                                                                                                              |
| Effluent from the factory  | ↓ water           |                                                                                                                          |
| Water Quality and Quantity | ↓ water           |                                                                                                                          |
|                            |                   | Pre-harvest fire could affect Warthog as it uses sugarcane as a hiding place                                             |
|                            |                   | Increased human disturbances through forest clearing, grazing and charcoal making reduces foraging and resting resources |
|                            |                   | Effluents could affect downstream water quality                                                                          |
|                            |                   | Too much water abstraction for irrigation affects downstream water availability                                          |

#### Risk Score

| Environmental Threats Related to Sugarcane | A | B | C | Risk Score |
|--------------------------------------------|---|---|---|------------|
| Clearing and Grabbing                      | 4 | 3 | 2 | 0.72       |
| Increased agrochemical inputs              | 4 | 0 | 0 | 0.10       |
| Fire                                       | 4 | 1 | 1 | 0.35       |
| Human Disturbances                         | 4 | 3 | 3 | 0.85       |
| Effluent from the factory                  | 1 | 0 | 0 | 0.025      |
| Water Quality and Quantity                 | 1 | 0 | 0 | 0.025      |
| Total risk                                 |   |   |   | 2.07       |

$$\text{Risk score} = \left( \frac{A}{D \times F} + \frac{B}{F} + C/N \right) / R$$

### 3) The Potential Impact of Sugarcane on the Resource Requirements of *Canis aureus*

| Categories of Resource requirement | Components of Resource requirement              |
|------------------------------------|-------------------------------------------------|
| Diet                               | Small animals, Plants, water (D = 3)            |
| Foraging habitat during wet        | Shrub lands, Woodlands, Riparian forest (F = 3) |
| Nesting/Roosting habitat           | Bushlands, Woodlands, Riparian forest (N = 3)   |
| Reliance on farmland               | 2                                               |

Reliance of the animal on area occupied by the sugarcane is 1 when species relies on 1 or 2 habitats, 2 when species relies on 3 or 4 habitats and 3 when the habitat or biotopes of the organism is 5 or greater

| Sugarcane Related Environmental Threats | Overlap with Forage | Overlap with Foraging Habitat | Overlap with Nesting Habitat | Overlap with Reproduction Active Member                |
|-----------------------------------------|---------------------|-------------------------------|------------------------------|--------------------------------------------------------|
| Clearing and grubbing                   | ↓ Small animals     | ↓ shrub land                  | ↓ shrub land                 | <i>Canis aureus</i> sometimes appears in the sugarcane |
|                                         | ↓ Plants food       | ↓ Woodland                    | ↓ Woodland                   |                                                        |
|                                         |                     | ↓ Riparian forest             | ↓ Riparian forest            |                                                        |
|                                         |                     |                               |                              |                                                        |
| Increased agrochemical inputs           | ↓ Small animals     |                               |                              | Agrochemicals has less impact on habitats              |
|                                         | ↓ Plants            |                               |                              |                                                        |
|                                         | ↓ water             |                               |                              |                                                        |

|                            |                 |                   |                                                                                                       |
|----------------------------|-----------------|-------------------|-------------------------------------------------------------------------------------------------------|
| Fire                       | ↓ Small animals | ↓ shrub land      | Pre-harvest fire disturbs <i>Canis aureus</i> when the burning field is close to the natural habitats |
|                            | ↓ Plants        | ↓ Woodland        |                                                                                                       |
|                            |                 | ↓ Riparian forest |                                                                                                       |
| Human disturbances         | ↓ Small animals | ↓ shrub land      | Human disturbances affects both the resting and the nesting habitats                                  |
|                            | ↓ Plants        | ↓ Woodland        |                                                                                                       |
|                            |                 | ↓ Riparian forest |                                                                                                       |
| Effluent from the factory  | ↓ water         |                   |                                                                                                       |
| Water Quality and Quantity | ↓ water         |                   | Too much water abstraction in the dry season affects the downstream water availability                |

#### Risk Score

| Environmental Threats Related to Sugarcane | A | B | C | Risk Score |
|--------------------------------------------|---|---|---|------------|
| Clearing and Grabbing                      | 2 | 3 | 3 | 1.11       |
| Increased agrochemical inputs              | 3 | 0 | 0 | 0.16       |
| Fire                                       | 2 | 0 | 3 | 0.61       |
| Human Disturbances                         | 2 | 3 | 3 | 1.11       |
| Effluent from the factory                  | 1 | 0 | 0 | 0.05       |
| Water Quantity and Quality                 | 1 | 0 | 0 | 0.05       |
| Total risk                                 |   |   |   | 3.09       |

$$\text{Risk score} = \left( \frac{A}{D \times F} + \frac{B}{F} + C/N \right) / R$$

**Table S3.** List of mammals in the area.

| No | Common Name           | Scientific Name                  | Local Name                |
|----|-----------------------|----------------------------------|---------------------------|
| 1  | Spotted hyena         | <i>Crocuta crocuta</i>           | Waraabessa                |
| 2  | Grey duiker           | <i>Sylvicapra grimmia</i>        | Kuruphee                  |
| 3  | Klipspringer          | <i>Oreotragus oreotragus</i>     | Gicii                     |
| 4  | Warthog               | <i>Phacochoerus aethiopicus</i>  | Goljaa                    |
| 5  | Leopard               | <i>Panther pardus</i>            | Qeerransa                 |
| 6  | Bat eared fox         | <i>Otocyton megalotis</i>        | Jeedala gurra bal,aa      |
| 7  | Serval cat            | <i>Felis serval</i>              | Deeroo                    |
| 8  | Common jackal         | <i>Canis aureus</i>              | Jeedala bakka maraa       |
| 9  | Anubis baboon         | <i>Papio Anubis</i>              | Jaldeessa                 |
| 10 | Vervet monkey         | <i>Cercopithecus pygerythrus</i> | Qamalee                   |
| 11 | Aardvark              | <i>Orycteropus afer</i>          | Awwaal diigessa           |
| 12 | Porcupine             | <i>Hystrix cristata</i>          | Dhaddee                   |
| 13 | Mongoose /Egyptian    | <i>Herpestes ichneumon</i>       | Amaa                      |
| 14 | Abyssinian Hare       | <i>Lepus capensis</i>            | Hilleettii                |
| 15 | Honey badger          | <i>Mellivoracapis</i>            | Amaa gaaguraa             |
| 16 | White tailed mongoose | <i>Ichneumia albicauda</i>       | Amaa gootaa/eegee adii    |
| 17 | Greater kudu          | <i>Tragelaphus strepsiceros</i>  | Gadamsa gammojjii guddaa  |
| 18 | Lesser kudu           | <i>Tragelaphus imberbis</i>      | Hammarreesa               |
| 19 | Striped hyena         | <i>Hyena hyena</i>               | Waraabessa sarara qabu    |
| 20 | Black-backed jackal   | <i>Canis mesomelas</i>           | Sardiida dugda gurrraacha |
| 21 | Side striped jackal   | <i>Canis adustus</i>             | Jeedala cinaan sararaa    |
| 22 | African civet         | <i>Civettictis civetta</i>       | Moor'ee                   |
| 23 | Abyssinian genet      | <i>Genetta abyssinica</i>        | Adala                     |
| 24 | Caracal               | <i>Felis caracal</i>             | Warbaa/daalga anbassaa    |
| 25 | Ichneumon mongoose    | <i>Herpestes ichneumon</i>       | Amaa                      |



Table S4. Risk score of the selected mammals.

| Scientific Name                 | English Name      | Foraging Materials                                                   | Foraging Habitats                                                                               | Roosting/<br>Breeding Habitat                         | IUCN Category | Qualitative Population Trend | Risk Score |
|---------------------------------|-------------------|----------------------------------------------------------------------|-------------------------------------------------------------------------------------------------|-------------------------------------------------------|---------------|------------------------------|------------|
| <i>Tragelaphus scriptus</i>     | Lesser Kudu       | Herbs, twigs, Leaves, crops, flowers, grasses, water                 | Forest edge<br>Bush lands, Riparian vegetation, Sugarcane                                       | Bush lands, Riparian vegetation                       | Least concern | Decreasing                   | 2.90       |
| <i>Phacochoerus aethiopicus</i> | Warthog           | Grass, bulbs tubers, invertebrates and leaves of woody plants, water | Bush land<br>Open wood land<br>Sugarcane                                                        | Bush land, Open wood land, Riparian Forest, Sugarcane | Least concern | Stable                       | 2.07       |
| <i>Canis aureus</i>             | Common Jackal     | Small animals<br>Plants                                              | Grassland, scrub forest                                                                         | Bushlands, Woodlands, Riparian forest                 | Least concern | Decreasing                   | 3.09       |
| <i>Hippopotamus amphibius</i>   | Hippopotamus      | Grass,                                                               | Water Body                                                                                      | River                                                 | Vulnerable    | Decreasing                   | 5.36       |
| <i>Cercopithecus ethiopicus</i> | Vervet monkey     | acacia seeds, flowers, foliage and gum, fruits                       | open woodland, forest-grassland mosaic, riparian vegetation                                     | Woodland, Shrub land, Riparian forest                 | Least concern | Decreasing                   | 2.54       |
| <i>Papio anubus</i>             | Anubis baboon     | Grass, fruit and insect                                              | Woodland, forest patch, agricultural area                                                       | Woodland, Shrub land, Riparian forest                 | Least concern | Stable                       | 2.19       |
| <i>Hystrix cristata</i>         | Crested Porcupine | Roots, tubers, cultivated crops, bark, and fallen fruit              | Shrub land, abandoned farmland, steppe, forest and dry rocky areas ( den deep burrow or a cave) | Deep burrow or a cave                                 | Least Concern | Increasing                   | 0.79       |
| <i>Crocuta crocuta</i>          | Spotted hyena     | Small animals<br>Scavenges                                           | Open wood land<br>Forest Patch                                                                  | Riparian forest, shrub land                           | Least Concern | Decreasing                   | 1.73       |
| <i>Lepus habessinicus</i>       | Abyssinian Hare   | leaves<br>seeds, grains, and nuts, flowers, crops                    | open grassland, steppe, shrub land , sugarcane                                                  | Deep burrow or a cave                                 | Least Concern | Stable                       | 1.67       |
| <i>Sylvicapra grimmia</i>       | Grey Duiker       | foliage, herbs, fruits, seeds, and cultivated crops                  | Woodland, agricultural land, Sugarcane                                                          | Woodland, Riparian Vegetation,                        | Least Concern | Increasing                   | 2.43       |

### Supplementary 3. Detailed Description of Bird Risk Assessment

Three birds that are familiar to key informants in Wonji Shoa sugarcane farm area were selected as indicator. The risk score of each species were done as per the risk assessment framework developed by Butler et al. [35]. The main ecological requirements considered is foraging and nesting resources. The top six environmental threats are land clearing, agrochemicals, pre-harvest fire, human disturbances, effluent discharge from factory, and water quantity and quality deterioration. The risk score for each species were calculated based on the overlaps of environmental threats from the sugarcane on species resource needs. Thus:

$$\text{Risk score} = (Dt + Nt) / R$$

where  $Dt$  describes the risk score associated with reduced food abundance or availability,  $Nt$  describes the risk score associated with reduced breeding success and  $R$  is the species' reliance on farmland habitat. Species that relies on 1 or 2 habitats is assumed to have major reliance ( $R = 1$ ), species that relies on three to four habitats has intermediate reliance ( $R = 2$ ); species that relies on five or more habitats has less reliance ( $R = 3$ ).

$$Dt = A/(D \times F) + B/F$$

where  $A$  describes number of points of coincidence risk and foraging materials,  $B$  describes number of points of coincidence between the environmental threats from the sugarcane and foraging habitats,  $D$  describes the total number of dietary components used by the species and  $F$  describes total number of foraging habitat components used by the species.

$$Nt = C/N$$

where  $C$  describes number of points of coincidence between sugarcane related environmental threats that cause reduced nesting success in existing habitat and loss of nesting habitat, and  $N$  describes number of nesting habitat components used by the species.

Risk scores for each of the five risk types ranked were calculated for each species. To calculate the total risk score for each species we summed the values of  $Dt$  and  $Nt$  over all five risk types and divided the cumulative score by  $R$ , with higher scores representing greater impact.

The risk score was calculated for all the selected birds and the result was indicated (Table 2). Only the detail for three species were presented here under.

1) The Potential Impact of Sugarcane on the Resource Requirements of *Bucorvus abyssinicus* (Abyssinian Ground Hornbill).

| Categories of Resource requirement | Components of resource requirement                                             |
|------------------------------------|--------------------------------------------------------------------------------|
| Diet                               | Terrestrial vertebrates, Insects, non-insect arthropods, scavenger ( $D = 4$ ) |
| Foraging habitat during wet        | Woodland, Cropped land, Sugarcane, Grassland ( $F = 4$ )                       |
| Nesting/Roosting habitat           | Large tree cavity, Rock holes ( $N = 2$ )                                      |
| Reliance on farmland               | 2                                                                              |

  

| Sugarcane Related Environmental Threats | Key Impacts                |                                        |                     |
|-----------------------------------------|----------------------------|----------------------------------------|---------------------|
|                                         | Foraging Materials         | Foraging Habitats                      | Nesting Habitats    |
| Land clearing                           | ↓ Insects                  | ↓ Woodland                             | Large tree cavity   |
|                                         | ↓ Terrestrial vertebrates, | ↓ Crop land                            |                     |
|                                         | ↓ non-insect arthropods    | ↓ Grassland                            |                     |
| Increased agrochemical inputs           | ↓ Insects                  | ↓ Agricultural land (Sugarcane Fallow) |                     |
|                                         | ↓ Terrestrial vertebrates, |                                        |                     |
|                                         | ↓ non-insect arthropods    |                                        |                     |
| Fire during cane harvest                | ↓ Insects                  |                                        |                     |
|                                         | ↓ Terrestrial vertebrates, |                                        |                     |
|                                         | ↓ non-insect arthropods    |                                        |                     |
| Human disturbances                      | ↓ Insects                  | ↓ Woodland                             | ↓ Large tree cavity |
|                                         | ↓ Terrestrial vertebrates, | ↓ Crop land                            |                     |

|                           |                            |             |
|---------------------------|----------------------------|-------------|
|                           | ↓ non-insect arthropods    | ↓ Grassland |
|                           | ↓ Insects                  |             |
| Effluent from the factory | ↓ Terrestrial vertebrates, |             |
|                           | ↓ non-insect arthropods    |             |
| Water Quality             |                            |             |

Risk Score

| Sugarcane Related Environmental Threats | A | B | C | Risk Score <sup>1</sup> |
|-----------------------------------------|---|---|---|-------------------------|
| Clearing and Grabbing                   | 3 | 3 | 1 | 0.78                    |
| Increased agrochemical inputs           | 3 | 1 | 0 | 0.21                    |
| Fire                                    | 3 | 0 | 0 | 0.09                    |
| Human disturbances                      | 3 | 3 | 1 | 0.78                    |
| Effluent from the factory               | 3 | 0 | 0 | 0.09                    |
| Water Quantity and Quality              | 0 | 0 | 0 | 0.00                    |
| Total risk                              |   |   |   | 1.95                    |

$$^1 \text{Risk score} = (A/(D \times F) + B/F + C/N)/R$$

2) The Potential Impact of Sugarcane on the Resource Requirements of *Francolinus castaneicollis* (Chestnut-napped Francolin).

| Categories of Resource requirement | Components of Resource requirement                               |
|------------------------------------|------------------------------------------------------------------|
| Diet                               | Seeds, insects, plant grass shoot ( $D = 3$ )                    |
| Foraging habitat during wet        | Shrub land, Cropped land, Sugarcane, Riparian forest ( $F = 4$ ) |
| Nesting/Roosting habitat           | Forest, Cropped land, Sugarcane, Grassland ( $N = 4$ )           |
| Reliance on farmland               | 2                                                                |

| Sugarcane Related Environmental Threats | Key Impacts        |                     |                    |
|-----------------------------------------|--------------------|---------------------|--------------------|
|                                         | Foraging Materials | ↓ Foraging Habitats | ↓ Nesting Habitats |
| Land Clearing                           | ↓ Seeds            | ↓ Shrub land        | ↓ Shrub Land       |
|                                         | ↓ Insects          | ↓ Crop Land         | ↓ Riparian Forest  |
|                                         | ↓ Grass shoots     | ↓ Riparian Forest   |                    |
| Increased agrochemical inputs           | ↓ Seeds            |                     |                    |
|                                         | ↓ Insects          |                     |                    |
|                                         | ↓ Grass shoots     |                     |                    |
| Fire during cane harvest                | ↓ Seeds            | ↓ Mature Sugarcane  | ↓ Mature Sugarcane |
|                                         | ↓ Insects          |                     |                    |
|                                         | ↓ Grass shoots     |                     |                    |
| Human disturbances                      | ↓ Seeds            | ↓ Shrub land        | ↓ Shrub Land       |
|                                         | ↓ Insects          | ↓ Riparian Forest   | ↓ Riparian Forest  |
|                                         | ↓ Grass shoots     |                     |                    |
| Effluent from the factory               | ↓ Seeds            | ↓ Forest            | ↓ Forest           |
|                                         | ↓ Insects          | ↓ Grassland         | ↓ Grassland        |
|                                         | ↓ Grass shoots     |                     |                    |
| Water Quantity                          | NA                 |                     |                    |

Risk Score

| Agricultural Change           | A | B | C | Risk Score <sup>1</sup> |
|-------------------------------|---|---|---|-------------------------|
| Clearing and Grabbing         | 3 | 3 | 1 | 0.63                    |
| Increased agrochemical inputs | 3 | 1 | 0 | 0.25                    |
| Fire                          | 3 | 1 | 1 | 0.37                    |

|                            |   |   |   |      |
|----------------------------|---|---|---|------|
| Human disturbances         | 3 | 2 | 2 | 0.63 |
| Effluent from the factory  | 3 | 2 | 2 | 0.63 |
| Water Quality and quantity | 0 | 0 | 0 | 0.00 |
| Total risk                 |   |   |   | 2.51 |

$$^1 \text{Risk score} = (A/(D \times F) + B/F + C/N)/R$$

3) The Potential Impact of Sugarcane on the Resource Requirements of *Numida meleagris* (Guinea Fowl).

| Categories of Resource requirement | Components of Resource requirement                               |
|------------------------------------|------------------------------------------------------------------|
| Diet                               | Seeds, insects, plant grass shoot ( $D = 3$ )                    |
| Foraging habitat during wet        | Shrub land, Cropped land, Sugarcane, Riparian forest ( $F = 4$ ) |
| Nesting/Roosting habitat           | Forest, Cropped land, Sugarcane, Grassland ( $N = 4$ )           |
| Reliance on farmland               | 2                                                                |

| Sugarcane Related Environmental Threats | Key Impacts    |                    |                    |
|-----------------------------------------|----------------|--------------------|--------------------|
|                                         | ↓ Food         | ↓ Foraging Habitat | ↓ Nesting Habitat  |
| Land Clearing                           | ↓ Seeds        | ↓ Shrub land       | ↓ Shrub Land       |
|                                         | ↓ Insects      | ↓ Crop Land        | ↓ Riparian Forest  |
|                                         | ↓ Grass shoots | ↓ Riparian Forest  |                    |
| Increased agrochemical inputs           | ↓ Seeds        |                    |                    |
|                                         | ↓ Insects      |                    |                    |
|                                         | ↓ Grass shoots |                    |                    |
| Fire during cane harvest                | ↓ Seeds        | ↓ Mature Sugarcane | ↓ Mature Sugarcane |
|                                         | ↓ Insects      |                    |                    |
|                                         | ↓ Grass shoots |                    |                    |
| Human disturbances                      | ↓ Seeds        | ↓ Shrub land       | ↓ Shrub Land       |
|                                         | ↓ Insects      | ↓ Riparian Forest  | ↓ Riparian Forest  |
|                                         | ↓ Grass shoots |                    |                    |
| Effluent from the factory               | ↓ Seeds        | ↓ Forest           | ↓ Forest           |
|                                         | ↓ Insects      | ↓ Grassland        | ↓ Grassland        |
|                                         | ↓ Grass shoots |                    |                    |
| Water Quantity                          | NA             |                    |                    |

Risk Score

| Sugarcane Related Environmental Threats | A | B | C | Risk Score |
|-----------------------------------------|---|---|---|------------|
| Clearing and Grabbing                   | 3 | 3 | 1 | 0.63       |
| Increased agrochemical inputs           | 3 | 1 | 0 | 0.25       |
| Fire                                    | 3 | 1 | 1 | 0.37       |
| Human disturbances                      | 3 | 2 | 2 | 0.63       |
| Effluent from the factory               | 3 | 2 | 2 | 0.63       |
| Water Quality and quantity              | 0 | 0 | 0 | 0.00       |
| Total risk                              |   |   |   | 2.51       |

$$\text{Risk score} = (A/(D \times F) + B/F + C/N)/R$$

**Table S5.** List of bird species in the area

| No | Common Name                    | Scientific Name                  |
|----|--------------------------------|----------------------------------|
| 1  | Little bee eater               | <i>Merops pusillus</i>           |
| 2  | African Hoopoe                 | <i>Upupa africana</i>            |
| 3  | Black wood hoopoe              | <i>Phoeniculus aterrimus</i>     |
| 4  | African grey woodpecker        | <i>Dendropicos goertae</i>       |
| 5  | Grey headed sparrow            | <i>Passer griseus</i>            |
| 6  | Shinning sun bird              | <i>Nectarinia habessinicus</i>   |
| 7  | Ruppell's long tailed starling | <i>Lamprotornis purpuroptera</i> |

|    |                               |                                   |
|----|-------------------------------|-----------------------------------|
| 8  | Red checked corden blue       | <i>Uraeginthus bengalus</i>       |
| 9  | Speckled mouse bird           | <i>Colius striatus</i>            |
| 10 | Ring necked dove              | <i>Streptopelia capicola</i>      |
| 11 | Laughing dove                 | <i>Streptopelia senegalensis</i>  |
| 12 | Helmeted guine fowl           | <i>Numida meleagris</i>           |
| 13 | African hawk eagle            | <i>Hieraaetus spilogaster</i>     |
| 14 | Black kite                    | <i>Milvus migrans</i>             |
| 15 | Superb starling               | <i>Lamprotornis superbus</i>      |
| 16 | Black headed batis            | <i>Batis minor</i>                |
| 17 | African paradise monarchy     | <i>Terpsiphone viridis</i>        |
| 18 | Speckled pigeon               | <i>Columba guinea</i>             |
| 19 | Pied crow                     | <i>Corvus albus</i>               |
| 20 | African rock                  | <i>Corvus capensis</i>            |
| 21 | Tawny flanked prinia          | <i>Prinia subflava</i>            |
| 22 | Hemprich's hornbill           | <i>Tockus hemprichii</i>          |
| 23 | Sinamon breasted rock bunting | <i>Emberiza tahapisi</i>          |
| 24 | Village indigobird            | <i>Vidua chalybeate</i>           |
| 25 | Red billed firefinch          | <i>Lagonosticta senegala</i>      |
| 26 | Northern black tit            | <i>Parus leucomelus</i>           |
| 27 | Blue breasted bee eater       | <i>Merops variegatus</i>          |
| 28 | Stout cisticola               | <i>Cisticola robustus</i>         |
| 29 | Northern red bishop           | <i>Euplectes franciscanus</i>     |
| 30 | Morning weather               | <i>Oenanthe lugens</i>            |
| 31 | Common bulbul                 | <i>Pycnonotus barbatus</i>        |
| 32 | Chestnut-naped francolin      | <i>Francolinus castaneicollis</i> |
| 33 | Abyssinian crimson wing       | <i>Cryptospiza salvadorii</i>     |
| 34 | Eurasian redstart             | <i>Phoenicurus phoenicurus</i>    |
| 35 | House bunting                 | <i>Emberiza striolata</i>         |
| 36 | Coppery sunbird               | <i>Cinnyris cupreus</i>           |
| 37 | Red billed ox pecker          | <i>Buphagus erythrorhynchus</i>   |
| 38 | Abyssinian Ground Hornbill    | <i>Bucorvus abyssinicus</i>       |

**Table S6.** Risk score assessment of bird species.

| Species                           | Foraging Habitat                                                       | Nesting                                    | Foraging Materials                                                 | Risk Score |
|-----------------------------------|------------------------------------------------------------------------|--------------------------------------------|--------------------------------------------------------------------|------------|
| <i>Bucorvus abyssinicus</i>       | Terrestrial vertebrates, Insectivore, non-insect arthropods, scavenger | Large tree cavity, Rock holes              | Terrestrial vertebrates, Insects, non-insect arthropods, scavenger | 1.95       |
| <i>Francolinus castaneicollis</i> | Seeds, insects, plant grass shoot                                      | Forest, Grassland, Cropped land, Sugarcane | Seeds, insects, plant grass shoot                                  | 2.51       |
| <i>Numida meleagris</i>           | Seeds, insects, plant grass shoot                                      | Forest, Grassland, Cropped land, Sugarcane | Seeds, insects, plant grass shoot                                  | 2.51       |
